# Supplementary material
Source: PubMed Central journal article supplement (PMC5738995)

## Supplementary Data

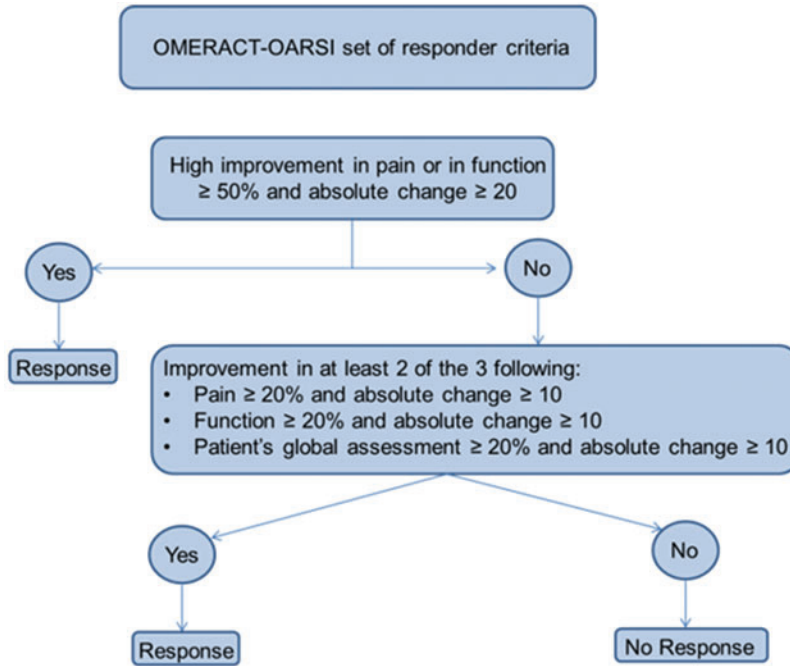

**SUPPLEMENTARY FIG. S1.** OMERACT-OARSI responder criteria.<sup>1</sup> OMERACT-OARSI, Outcome Measures in Rheumatology-Osteoarthritis Research Society International.

## Supplementary Table S1. Inclusion Criteria

---

### Inclusion criteria

---

1. Male or female  $\geq 40$  and  $\leq 75$  years old at time of injection.
  2. A standing radiograph of the knee showing a Kellgren–Lawrence grade of 2 to 4 (within 6 months of screening).
  3. Body mass index  $\leq 40$  kg/m<sup>2</sup>.
  4. A Western Ontario and McMaster Universities osteoarthritis index using the Likert scale, Version 3. (WOMAC LK 3.1) pain subscale total score  $\geq 10$  and  $\leq 19$ .
  5. Has undergone at least two prior conservative OA therapies without satisfactory pain relief.
  6. Patient has failed to get satisfactory pain relief from either HA or steroid injections, or would be considered an appropriate patient to receive either HA or steroid injections
- 

HA, hyaluronic acid; OA, osteoarthritis; WOMAC, Western Ontario and McMaster Universities Osteoarthritis Index.

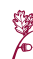

## Supplementary Table S2. Exclusion Criteria

---

### Exclusion criteria

---

1. Presence of active infection or abnormal effusion in the knee immediately preceding treatment injection.
  2. Presence of symptomatic OA in the nonstudy knee.
  3. Diagnosed with rheumatoid arthritis, Reiter's syndrome, psoriatic arthritis, gout, ankylosing spondylitis, chondromalacia, and arthritis secondary to other inflammatory diseases, or of metabolic origin; HIV, viral hepatitis; chondrocalcinosis, Paget's disease, villonodular synovitis, and other non-OA joint disease.
  4. Disease of spine, hip, or other lower extremity joints of sufficient degree to affect assessment of the index knee.
  5. Untreated symptomatic injury of index knee (e.g., acute traumatic injury, anterior cruciate ligament injury, meniscus injury, and cartilage lesion).
  6. Knee radiographs showing bone-on-bone or other gross cartilage deficits.
  7. Presence of surgical hardware or other foreign body in the index knee.
  8. Intra-articular steroid injections in the index knee within 3 months of screening.
  9. Intra-articular HA in the index knee within 6 months of screening.
  10. Other intra-articular therapy in the index knee within 6 months before screening.
  11. Systemic steroid use within 2 weeks of screening.
  12. Planned/anticipated surgery of the index knee during the study period.
  13. A history of local anesthetic allergy
  14. Use of systemic immunosuppressants within 6 weeks of treatment.
  15. Currently on anticoagulant therapy.
  16. Any documented clinically significant condition (e.g., diabetes and malignancy), finding, or psychiatric illness at screening, which could compromise patient safety or interfere with the assessment of the safety and treatment effects of the study injection.
  17. Skin breakdown at the index knee where the injection is planned to take place.
  18. Pregnant or nursing mothers, or women who are planning on getting pregnant during the time they will be participating in the study.
  19. Known drug or alcohol dependence currently or within the last year.
  20. Used any investigational drug or device within 30 days before screening.
  21. Used any investigational biologic within 60 days before screening
- 



**Supplementary Table S3. APS Amount Calculation**

| Subject            | APS volume (mL) | IL-1ra concentration (pg/mL) | Amount (pg) |
|--------------------|-----------------|------------------------------|-------------|
| APS1               | 3.0             | 51,895.5                     | 155,686.4   |
| APS2               | 2.8             | 120,783.1                    | 338,192.7   |
| APS3               | 2.5             | 49,056.1                     | 122,640.3   |
| APS4               | 2.8             | 70,555.8                     | 197,556.2   |
| APS5               | 3.0             | 68,304.0                     | 204,912.1   |
| APS6               | 3.2             | 38,335.8                     | 122,674.6   |
| APS7               | 2.8             | 48,831.8                     | 136,729.0   |
| APS11              | 3.0             | 57,616.0                     | 172,848.0   |
| APS12              | 2.4             | 80,178.1                     | 192,427.5   |
| APS14              | 3.0             | 51,839.4                     | 155,518.3   |
| Average            | 2.9             | 63,739.6                     | 179,918.5   |
| Standard deviation | 0.2             | 23,556.3                     | 63,068.3    |



**Supplementary Table S4. IL-1ra:IL-1  $\beta$  Ratio Calculation**

| Subject            | IL-1ra (pg/mL) | IL-1 $\beta$ (pg/mL) | Ratio    |
|--------------------|----------------|----------------------|----------|
| APS1               | 51,895.5       | 4.1                  | 12,801.1 |
| APS2               | 120,783.1      | 19.0                 | 6,348.3  |
| APS3               | 49,056.1       | 88.0                 | 557.7    |
| APS4               | 70,555.8       | 6.8                  | 10,331.8 |
| APS5               | 68,304.0       | 6.9                  | 9,869.1  |
| APS6               | 38,335.8       | 3.3                  | 11,652.2 |
| APS7               | 48,831.8       | 7.7                  | 6,352.5  |
| APS11              | 57,616.0       | 8.6                  | 6,715.9  |
| APS12              | 80,178.1       | 7.3                  | 10,947.3 |
| APS14              | 51,839.4       | 12.9                 | 4,028.2  |
| Average            | 63,739.6       | 16.5                 | 7,960.4  |
| Standard deviation | 23,556.3       | 25.5                 | 3,833.3  |

**Reference**

1. Wanstrath AW, Hettlich BF, Su L, et al. Evaluation of a single intra-articular injection of autologous protein solution for treatment of osteoarthritis in a canine population. *Vet Surg.* 2016;45:764–774.



Supplement: Supp_Data.pdf [file Supp_Data.pdf]
